# Supplementary material for: Recreational Screen Use and Internalizing Problems from Preadolescence to Young Adulthood: A population-based Cohort and Co-Twin Control Study
Source: Research Square preprint supplement (doi:10.21203/rs.3.rs-7278950/v1), 2025-08-22
Supplement: Supplementary file 2 [file fc0eb9d72c031ebad5574515.xlsx]

## Sheet: Table_of_Content
Manuscript title:	Recreational Screen Use and Internalizing Problems from Preadolescence to Young Adulthood: A population-based Cohort and Co-Twin Control Study
Author names:	Tong Gong, Emma Frans, Anna Ohlis, Shuyang Yao, Ruyue Zhang, Anders Nilsson, Yasmina Molero, Miriam A Mosing, Isabell Brikell, Henrik Larsson, Paul Lichtenstein, Lisa B Thorell, Patrik KE Magnusson, Ralf Kuja-Halkola, Yi Lu
Table of Content
Table name	Table title
eTable1 (see the supplementary word file)	Detailed information on screen use questions in CATSS
eTable2 (see the supplementary word file)	Detailed information on depression, anxiety, and other psychiatric traits' assessment instruments used in CATSS
eTable3 (see the supplementary word file)	Diagnostic codes used to identify clincal outcomes of internalizing conditions from national registers
eTable4	CATSS-9 participants' characteristics by screen use on chat, downloading music, surfing internet
eTable5	CATSS-9 participants' characteristics by screen use on playing games
eTable6	CATSS-9 participants' characteristics by screen use on watching TV, video, DVD
eTable7	CATSS-15 participants' characteristics by screen use on playing games, chat, browsing internet during weekdays
eTable8	CATSS-15 participants' characteristics by screen use on playing games, chat, browsing internet during weekend
eTable9	CATSS-15 participants' characteristics by screen use on watching TV, video, DVD during weekdays
eTable10	CATSS-15 participants' characteristics by screen use on watching TV, video, DVD during weekend
eTable11	CATSS-18 participants' characteristics by screen use on playing games, chat, browsing internet during weekdays
eTable12	CATSS-18 participants' characteristics by screen use on playing games, chat, browsing internet during weekend
eTable13	CATSS-18 participants' characteristics by screen use on watching TV, video, DVD during weekdays
eTable14	CATSS-18 participants' characteristics by screen use on watching TV, video, DVD during weekend
eTable15	CATSS-24 participants' characteristics by screen use on playing games, chat, browsing internet during weekdays at 18 years of age
eTable16	CATSS-24 participants' characteristics by screen use on playing games, chat, browsing internet during weekend at 18 years of age
eTable17	CATSS-24 participants' characteristics by screen use on watching TV, video, DVD during weekdays at 18 years of age
eTable18	CATSS-24 participants' characteristics by screen use on watching TV, video, DVD during weekdend at 18 years of age
eTable19	Within-twin-pair correlations for the screen use and internalizing symptoms using CATSS-9, -15, -18 and -24 samples
eTable20	Cross-sectional associations of screen use with internalizing problems using CATSS-9, -15 and -18 samples
eTable21	Cross-sectional associations of screen use with internalizing problems using CATSS-9, -15 and -18 samples, stratified by sex
eTable22	Cross-age associations of screen use with internalizing problems using CATSS-9, -15, -18, and -24 samples
eTable23	Cross-age associations of screen use with internalizing problems using CATSS-9, -15, -18, and -24 samples, stratified by sex
eTable24	Cross-age (reverse) associations of internalizing problems with screen use use using CATSS-9, -15, and -18 samples
eTable25	Associations between screen use trajectories (16 categories) at ages 15 and 18 years with internalizing problems at 18 and 24 years using CATSS-15, -18, and -24 samples.
eTable26	Associations between screen use trajectories (6 categories) at ages 15 and 18 years with internalizing problems at 18 and 24 years using CATSS-15, -18, and -24 samples.
eTable27	Associations between screen use trajectories (6 categories) at ages 15 and 18 years with internalizing problems at 18 and 24 years using CATSS-15, -18, and -24 samples, stratified by sex
eTable28	Hazard Ratios (HR) and 95% Confidence Intervals (CI) of the clinical outcomes of internalizing conditions by screen use among two subsets of CATSS-9 and -15 samples, all twins and stratified by sex.

## Sheet: eTable4
eTable 4. CATSS-9 participants' characteristics by screen use frequencies on chat, downloading music, surfing internet
	Total	Screen time use frequencies on chat, downloading music, surfing internet at age 9
		≤2 times/week	3-6 times/week	Daily
	(N=21797)	(N=15158)	(N=2738)	(N=3901)
Sex
Male	10931 (50.1%)	7858 (51.8%)	1233 (45.0%)	1840 (47.2%)
Female	10866 (49.9%)	7300 (48.2%)	1505 (55.0%)	2061 (52.8%)
Birth year
1998-2001	6600 (30.3%)	5949 (39.2%)	436 (15.9%)	215 (5.5%)
2002-2004	5425 (24.9%)	4050 (26.7%)	740 (27.0%)	635 (16.3%)
2005-2007	5161 (23.7%)	3291 (21.7%)	773 (28.2%)	1097 (28.1%)
2008-2010	4611 (21.2%)	1868 (12.3%)	789 (28.8%)	1954 (50.1%)
Zygosity
MZ twins	6639 (30.5%)	4549 (30.0%)	839 (30.6%)	1251 (32.1%)
DZ twins same sex	7399 (33.9%)	5213 (34.4%)	861 (31.4%)	1325 (34.0%)
DZ twins opposite sex	7510 (34.5%)	5236 (34.5%)	1004 (36.7%)	1270 (32.6%)
Unknown	249 (1.1%)	160 (1.1%)	34 (1.2%)	55 (1.4%)
Mother's birth country
Sweden	19374 (88.9%)	13465 (88.8%)	2449 (89.4%)	3460 (88.7%)
Abroad	2395 (11.0%)	1672 (11.0%)	288 (10.5%)	435 (11.2%)
Missing	28 (0.1%)	21 (0.1%)	1 (0.0%)	6 (0.2%)
Father's birth country
Sweden	19234 (88.2%)	13364 (88.2%)	2440 (89.1%)	3430 (87.9%)
Abroad	2479 (11.4%)	1737 (11.5%)	287 (10.5%)	455 (11.7%)
Missing	84 (0.4%)	57 (0.4%)	11 (0.4%)	16 (0.4%)
Mother's education level
Compulsory school	1121 (5.1%)	801 (5.3%)	134 (4.9%)	186 (4.8%)
High school	6745 (30.9%)	4974 (32.8%)	687 (25.1%)	1084 (27.8%)
University or higher	13263 (60.8%)	8947 (59.0%)	1812 (66.2%)	2504 (64.2%)
Missing	668 (3.1%)	436 (2.9%)	105 (3.8%)	127 (3.3%)
Father's education level
Compulsory school	3407 (15.6%)	2399 (15.8%)	382 (14.0%)	626 (16.0%)
High school	8542 (39.2%)	6138 (40.5%)	995 (36.3%)	1409 (36.1%)
University or higher	9127 (41.9%)	6134 (40.5%)	1247 (45.5%)	1746 (44.8%)
Missing	721 (3.3%)	487 (3.2%)	114 (4.2%)	120 (3.1%)
Parents' highest education level
Compulsory school	424 (1.9%)	313 (2.1%)	45 (1.6%)	66 (1.7%)
High school	5912 (27.1%)	4377 (28.9%)	603 (22.0%)	932 (23.9%)
University or higher	15148 (69.5%)	10279 (67.8%)	2034 (74.3%)	2835 (72.7%)
Missing	313 (1.4%)	189 (1.2%)	56 (2.0%)	68 (1.7%)
Parent reported ACEs
No	20301 (93.1%)	14182 (93.6%)	2575 (94.0%)	3544 (90.8%)
Yes	1483 (6.8%)	966 (6.4%)	162 (5.9%)	355 (9.1%)
Missing	13 (0.1%)	10 (0.1%)	1 (0.0%)	2 (0.1%)
SCARED total score
Mean (SD)	5.84 (7.18)	5.48 (6.83)	5.65 (6.65)	7.33 (8.51)
Median [Min, Max]	4.00 [0, 74.0]	3.00 [0, 74.0]	4.00 [0, 59.0]	5.00 [0, 67.0]
Missing	9 (0.0%)	7 (0.0%)	1 (0.0%)	1 (0.0%)
S-MFQ total score
Mean (SD)	1.02 (2.46)	0.938 (2.32)	0.979 (2.20)	1.36 (3.09)
Median [Min, Max]	0 [0, 26.0]	0 [0, 25.0]	0 [0, 24.0]	0 [0, 26.0]
Missing	14 (0.1%)	10 (0.1%)	1 (0.0%)	3 (0.1%)
Abbreviations. MZ: Monozygotic. DZ: Dizygotic. ACE: Adverse childhood experience. A-TAC: Autism-Tics, ADHD and other Comorbidities inventory. SCARED: Screen for Child Anxiety Related Disorders. S-MFQ: Short Mood and Feelings Questionnaire.

## Sheet: eTable5
eTable 5. CATSS-9 participants' characteristics by screen use frequencies on playing computer or video games
	Total	Screen time use frequencies on playing computer or video games at age 9
		≤2 times/week	3-6 times/week	Daily
	(N=21797)	(N=8120)	(N=6979)	(N=6698)
Sex
Male	10931 (50.1%)	2766 (34.1%)	3966 (56.8%)	4199 (62.7%)
Female	10866 (49.9%)	5354 (65.9%)	3013 (43.2%)	2499 (37.3%)
Birth year
1998-2001	6600 (30.3%)	3052 (37.6%)	2224 (31.9%)	1324 (19.8%)
2002-2004	5425 (24.9%)	2178 (26.8%)	1728 (24.8%)	1519 (22.7%)
2005-2007	5161 (23.7%)	1412 (17.4%)	1684 (24.1%)	2065 (30.8%)
2008-2010	4611 (21.2%)	1478 (18.2%)	1343 (19.2%)	1790 (26.7%)
Zygosity
MZ twins	6639 (30.5%)	2494 (30.7%)	2032 (29.1%)	2113 (31.5%)
DZ twins same sex	7399 (33.9%)	2626 (32.3%)	2419 (34.7%)	2354 (35.1%)
DZ twins opposite sex	7510 (34.5%)	2910 (35.8%)	2457 (35.2%)	2143 (32.0%)
Unknown	249 (1.1%)	90 (1.1%)	71 (1.0%)	88 (1.3%)
Mother's birth country
Sweden	19374 (88.9%)	7162 (88.2%)	6288 (90.1%)	5924 (88.4%)
Abroad	2395 (11.0%)	946 (11.7%)	685 (9.8%)	764 (11.4%)
Missing	28 (0.1%)	12 (0.1%)	6 (0.1%)	10 (0.1%)
Father's birth country
Sweden	19234 (88.2%)	7092 (87.3%)	6266 (89.8%)	5876 (87.7%)
Abroad	2479 (11.4%)	997 (12.3%)	685 (9.8%)	797 (11.9%)
Missing	84 (0.4%)	31 (0.4%)	28 (0.4%)	25 (0.4%)
Mother's education level
Compulsory school	1121 (5.1%)	430 (5.3%)	330 (4.7%)	361 (5.4%)
High school	6745 (30.9%)	2636 (32.5%)	2012 (28.8%)	2097 (31.3%)
University or higher	13263 (60.8%)	4803 (59.2%)	4409 (63.2%)	4051 (60.5%)
Missing	668 (3.1%)	251 (3.1%)	228 (3.3%)	189 (2.8%)
Father's education level
Compulsory school	3407 (15.6%)	1278 (15.7%)	978 (14.0%)	1151 (17.2%)
High school	8542 (39.2%)	3360 (41.4%)	2667 (38.2%)	2515 (37.5%)
University or higher	9127 (41.9%)	3215 (39.6%)	3076 (44.1%)	2836 (42.3%)
Missing	721 (3.3%)	267 (3.3%)	258 (3.7%)	196 (2.9%)
Parents' highest education level
Compulsory school	424 (1.9%)	178 (2.2%)	113 (1.6%)	133 (2.0%)
High school	5912 (27.1%)	2341 (28.8%)	1767 (25.3%)	1804 (26.9%)
University or higher	15148 (69.5%)	5501 (67.7%)	4973 (71.3%)	4674 (69.8%)
Missing	313 (1.4%)	100 (1.2%)	126 (1.8%)	87 (1.3%)
Parent reported ACEs
No	20301 (93.1%)	7571 (93.2%)	6570 (94.1%)	6160 (92.0%)
Yes	1483 (6.8%)	544 (6.7%)	404 (5.8%)	535 (8.0%)
Missing	13 (0.1%)	5 (0.1%)	5 (0.1%)	3 (0.0%)
SCARED total score
Mean (SD)	5.84 (7.18)	5.60 (6.82)	5.28 (6.45)	6.69 (8.17)
Median [Min, Max]	4.00 [0, 74.0]	3.00 [0, 74.0]	3.00 [0, 62.0]	4.00 [0, 67.0]
Missing	9 (0.0%)	7 (0.1%)	2 (0.0%)	0 (0%)
S-MFQ total score
Mean (SD)	1.02 (2.46)	0.884 (2.22)	0.945 (2.22)	1.26 (2.93)
Median [Min, Max]	0 [0, 26.0]	0 [0, 25.0]	0 [0, 22.0]	0 [0, 26.0]
Missing	14 (0.1%)	7 (0.1%)	5 (0.1%)	2 (0.0%)
Abbreviations. MZ: Monozygotic. DZ: Dizygotic. ACE: Adverse childhood experience. A-TAC: Autism-Tics, ADHD and other Comorbidities inventory. SCARED: Screen for Child Anxiety Related Disorders. S-MFQ: Short Mood and Feelings Questionnaire.

## Sheet: eTable6
eTable 6. CATSS-9 participants' characteristics by screen use frequencies on watching TV, video, DVD.
	Total	Screen time use frequencies on watching TV, video, DVD at age 9
		≤2 times/week	3-6 times/week	Daily
	(N=21797)	(N=2914)	(N=4471)	(N=14412)
Sex
Male	10931 (50.1%)	1532 (52.6%)	2218 (49.6%)	7181 (49.8%)
Female	10866 (49.9%)	1382 (47.4%)	2253 (50.4%)	7231 (50.2%)
Birth year
1998-2001	6600 (30.3%)	461 (15.8%)	1305 (29.2%)	4834 (33.5%)
2002-2004	5425 (24.9%)	469 (16.1%)	1076 (24.1%)	3880 (26.9%)
2005-2007	5161 (23.7%)	713 (24.5%)	1072 (24.0%)	3376 (23.4%)
2008-2010	4611 (21.2%)	1271 (43.6%)	1018 (22.8%)	2322 (16.1%)
Zygosity
MZ twins	6639 (30.5%)	938 (32.2%)	1416 (31.7%)	4285 (29.7%)
DZ twins same sex	7399 (33.9%)	923 (31.7%)	1495 (33.4%)	4981 (34.6%)
DZ twins opposite sex	7510 (34.5%)	1015 (34.8%)	1499 (33.5%)	4996 (34.7%)
Unknown	249 (1.1%)	38 (1.3%)	61 (1.4%)	150 (1.0%)
Mother's birth country
Sweden	19374 (88.9%)	2462 (84.5%)	4032 (90.2%)	12880 (89.4%)
Abroad	2395 (11.0%)	448 (15.4%)	436 (9.8%)	1511 (10.5%)
Missing	28 (0.1%)	4 (0.1%)	3 (0.1%)	21 (0.1%)
Father's birth country
Sweden	19234 (88.2%)	2486 (85.3%)	4011 (89.7%)	12737 (88.4%)
Abroad	2479 (11.4%)	413 (14.2%)	444 (9.9%)	1622 (11.3%)
Missing	84 (0.4%)	15 (0.5%)	16 (0.4%)	53 (0.4%)
Mother's education level
Compulsory school	1121 (5.1%)	170 (5.8%)	187 (4.2%)	764 (5.3%)
High school	6745 (30.9%)	658 (22.6%)	1243 (27.8%)	4844 (33.6%)
University or higher	13263 (60.8%)	1958 (67.2%)	2907 (65.0%)	8398 (58.3%)
Missing	668 (3.1%)	128 (4.4%)	134 (3.0%)	406 (2.8%)
Father's education level
Compulsory school	3407 (15.6%)	480 (16.5%)	597 (13.4%)	2330 (16.2%)
High school	8542 (39.2%)	902 (31.0%)	1582 (35.4%)	6058 (42.0%)
University or higher	9127 (41.9%)	1420 (48.7%)	2116 (47.3%)	5591 (38.8%)
Missing	721 (3.3%)	112 (3.8%)	176 (3.9%)	433 (3.0%)
Parents' highest education level
Compulsory school	424 (1.9%)	63 (2.2%)	76 (1.7%)	285 (2.0%)
High school	5912 (27.1%)	574 (19.7%)	1042 (23.3%)	4296 (29.8%)
University or higher	15148 (69.5%)	2209 (75.8%)	3275 (73.2%)	9664 (67.1%)
Missing	313 (1.4%)	68 (2.3%)	78 (1.7%)	167 (1.2%)
Parent reported ACEs
No	20301 (93.1%)	2666 (91.5%)	4192 (93.8%)	13443 (93.3%)
Yes	1483 (6.8%)	242 (8.3%)	278 (6.2%)	963 (6.7%)
Missing	13 (0.1%)	6 (0.2%)	1 (0.0%)	6 (0.0%)
SCARED total score
Mean (SD)	5.84 (7.18)	6.56 (8.30)	5.22 (6.25)	5.88 (7.18)
Median [Min, Max]	4.00 [0, 74.0]	4.00 [0, 67.0]	3.00 [0, 74.0]	4.00 [0, 74.0]
Missing	9 (0.0%)	4 (0.1%)	1 (0.0%)	4 (0.0%)
S-MFQ total score
Mean (SD)	1.02 (2.46)	1.03 (2.53)	0.922 (2.26)	1.05 (2.51)
Median [Min, Max]	0 [0, 26.0]	0 [0, 24.0]	0 [0, 24.0]	0 [0, 26.0]
Missing	14 (0.1%)	3 (0.1%)	1 (0.0%)	10 (0.1%)
Abbreviations. MZ: Monozygotic. DZ: Dizygotic. ACE: Adverse childhood experience. A-TAC: Autism-Tics, ADHD and other Comorbidities inventory. SCARED: Screen for Child Anxiety Related Disorders. S-MFQ: Short Mood and Feelings Questionnaire.

## Sheet: eTable7
eTable 7. CATSS-15 participants' characteristics by screen use frequencies on playing games, chat, browsing internet during weekdays
	Total	Mon-Fri: screen time use frequencies on playing games, chat, browsing internet at age 15
		<2 hours/day	2-4 hours/day	4-6 hours/day	>6 hours/day
	(N=16027)	(N=6925)	(N=5197)	(N=2798)	(N=1107)
Sex
Male	7228 (45.1%)	2666 (38.5%)	2605 (50.1%)	1430 (51.1%)	527 (47.6%)
Female	8799 (54.9%)	4259 (61.5%)	2592 (49.9%)	1368 (48.9%)	580 (52.4%)
Birth year
1994-1996	4086 (25.5%)	2158 (31.2%)	1185 (22.8%)	563 (20.1%)	180 (16.3%)
1997-1999	4135 (25.8%)	1893 (27.3%)	1257 (24.2%)	709 (25.3%)	276 (24.9%)
2000-2002	3934 (24.5%)	1549 (22.4%)	1349 (26.0%)	716 (25.6%)	320 (28.9%)
2003-2005	3872 (24.2%)	1325 (19.1%)	1406 (27.1%)	810 (28.9%)	331 (29.9%)
Zygosity
MZ twins	4751 (29.6%)	2164 (31.2%)	1502 (28.9%)	776 (27.7%)	309 (27.9%)
DZ twins same sex	5343 (33.3%)	2302 (33.2%)	1770 (34.1%)	919 (32.8%)	352 (31.8%)
DZ twins opposite sex	5569 (34.7%)	2319 (33.5%)	1823 (35.1%)	1014 (36.2%)	413 (37.3%)
Unknown	364 (2.3%)	140 (2.0%)	102 (2.0%)	89 (3.2%)	33 (3.0%)
Mother's birth country
Sweden	13325 (83.1%)	5772 (83.4%)	4394 (84.5%)	2272 (81.2%)	887 (80.1%)
Abroad	1626 (10.1%)	705 (10.2%)	493 (9.5%)	297 (10.6%)	131 (11.8%)
Missing	1076 (6.7%)	448 (6.5%)	310 (6.0%)	229 (8.2%)	89 (8.0%)
Father's birth country
Sweden	13219 (82.5%)	5728 (82.7%)	4354 (83.8%)	2261 (80.8%)	876 (79.1%)
Abroad	1688 (10.5%)	729 (10.5%)	520 (10.0%)	300 (10.7%)	139 (12.6%)
Missing	1120 (7.0%)	468 (6.8%)	323 (6.2%)	237 (8.5%)	92 (8.3%)
Mother's education level
Compulsory school	1003 (6.3%)	402 (5.8%)	288 (5.5%)	207 (7.4%)	106 (9.6%)
High school	4665 (29.1%)	1928 (27.8%)	1501 (28.9%)	863 (30.8%)	373 (33.7%)
University or higher	9047 (56.4%)	4052 (58.5%)	3028 (58.3%)	1447 (51.7%)	520 (47.0%)
Missing	1312 (8.2%)	543 (7.8%)	380 (7.3%)	281 (10.0%)	108 (9.8%)
Father's education level
Compulsory school	2161 (13.5%)	841 (12.1%)	694 (13.4%)	424 (15.2%)	202 (18.2%)
High school	5935 (37.0%)	2478 (35.8%)	1936 (37.3%)	1091 (39.0%)	430 (38.8%)
University or higher	6802 (42.4%)	3129 (45.2%)	2247 (43.2%)	1043 (37.3%)	383 (34.6%)
Missing	1129 (7.0%)	477 (6.9%)	320 (6.2%)	240 (8.6%)	92 (8.3%)
Parents' highest education level
Compulsory school	693 (4.3%)	267 (3.9%)	218 (4.2%)	139 (5.0%)	69 (6.2%)
High school	3953 (24.7%)	1625 (23.5%)	1259 (24.2%)	734 (26.2%)	335 (30.3%)
University or higher	10295 (64.2%)	4576 (66.1%)	3413 (65.7%)	1692 (60.5%)	614 (55.5%)
Missing	1086 (6.8%)	457 (6.6%)	307 (5.9%)	233 (8.3%)	89 (8.0%)
Parents' civil status
Married/cohabiting	10617 (66.2%)	4760 (68.7%)	3494 (67.2%)	1731 (61.9%)	632 (57.1%)
Single/divorced/separted/widowed	2183 (13.6%)	849 (12.3%)	699 (13.5%)	449 (16.0%)	186 (16.8%)
Other	73 (0.5%)	27 (0.4%)	25 (0.5%)	12 (0.4%)	9 (0.8%)
Missing	3154 (19.7%)	1289 (18.6%)	979 (18.8%)	606 (21.7%)	280 (25.3%)
Depressive disorders (Diagnosis)
No	15656 (97.7%)	6781 (97.9%)	5081 (97.8%)	2725 (97.4%)	1069 (96.6%)
Yes	371 (2.3%)	144 (2.1%)	116 (2.2%)	73 (2.6%)	38 (3.4%)
Self-harm (Diagnosis)
No	15955 (99.6%)	6895 (99.6%)	5177 (99.6%)	2782 (99.4%)	1101 (99.5%)
Yes	72 (0.4%)	30 (0.4%)	20 (0.4%)	16 (0.6%)	6 (0.5%)
Anxiety disorders (Diagnosis)
No	15562 (97.1%)	6726 (97.1%)	5064 (97.4%)	2718 (97.1%)	1054 (95.2%)
Yes	465 (2.9%)	199 (2.9%)	133 (2.6%)	80 (2.9%)	53 (4.8%)
SDQ (self-reported) total score
Mean (SD)	22.7 (4.68)	22.5 (4.56)	22.5 (4.57)	22.9 (4.89)	23.4 (5.24)
Median [Min	22.0 [0, 50.0]	22.0 [0, 50.0]	22.0 [0, 50.0]	23.0 [0, 50.0]	23.0 [4.00, 40.0]
Missing	194 (1.2%)	76 (1.1%)	68 (1.3%)	34 (1.2%)	16 (1.4%)
SDQ (self-reported) subscale score on emotional symptoms
Mean (SD)	3.09 (2.35)	2.94 (2.27)	3.01 (2.31)	3.36 (2.42)	3.78 (2.66)
Median [Min, Max]	3.00 [0, 10.0]	3.00 [0, 10.0]	3.00 [0, 10.0]	3.00 [0, 10.0]	3.00 [0, 10.0]
Missing	198 (1.2%)	78 (1.1%)	70 (1.3%)	34 (1.2%)	16 (1.4%)
At age 9: Standardized score on anxiety symptoms (based on SCARED or A-TAC anxiety subscale)
Mean (SD)	0.000000000260 (1.00)	-0.00362 (1.02)	-0.0139 (0.950)	0.00341 (0.986)	0.0836 (1.12)
Median [Min, Max]	-0.182 [-0.811, 15.2]	-0.182 [-0.811, 15.2]	-0.182 [-0.811, 11.7]	-0.182 [-0.811, 9.51]	-0.182 [-0.811, 9.30]
Missing	2882 (18.0%)	1209 (17.5%)	880 (16.9%)	561 (20.1%)	232 (21.0%)
Abbreviations. MZ: Monozygotic, DZ: Dizygotic. SDQ: Strengths and Difficulties Questionnaire. SCARED: Screen for Child Anxiety Related Disorders. A-TAC: Autism-Tics, ADHD and other Comorbidities inventory.

## Sheet: eTable8
eTable 8. CATSS-15 participants' characteristics by screen use frequencies on playing games, chat, browsing internet during weekend
	Total	Sat-Sun: screen time use frequencies on playing games, chat, browsing internet at age 15
		<2 hours/day	2-4 hours/day	4-6 hours/day	>6 hours/day
	(N=16027)	(N=4789)	(N=4734)	(N=3771)	(N=2733)
Sex
Male	7228 (45.1%)	1451 (30.3%)	2088 (44.1%)	2014 (53.4%)	1675 (61.3%)
Female	8799 (54.9%)	3338 (69.7%)	2646 (55.9%)	1757 (46.6%)	1058 (38.7%)
Birth year
1994-1996	4086 (25.5%)	1544 (32.2%)	1254 (26.5%)	752 (19.9%)	536 (19.6%)
1997-1999	4135 (25.8%)	1309 (27.3%)	1200 (25.3%)	934 (24.8%)	692 (25.3%)
2000-2002	3934 (24.5%)	1049 (21.9%)	1143 (24.1%)	1002 (26.6%)	740 (27.1%)
2003-2005	3872 (24.2%)	887 (18.5%)	1137 (24.0%)	1083 (28.7%)	765 (28.0%)
Zygosity
MZ twins	4751 (29.6%)	1549 (32.3%)	1412 (29.8%)	1054 (28.0%)	736 (26.9%)
DZ twins same sex	5343 (33.3%)	1539 (32.1%)	1647 (34.8%)	1245 (33.0%)	912 (33.4%)
DZ twins opposite sex	5569 (34.7%)	1594 (33.3%)	1578 (33.3%)	1388 (36.8%)	1009 (36.9%)
Unknown	364 (2.3%)	107 (2.2%)	97 (2.0%)	84 (2.2%)	76 (2.8%)
Mother's birth country
Sweden	13325 (83.1%)	4027 (84.1%)	3966 (83.8%)	3120 (82.7%)	2212 (80.9%)
Abroad	1626 (10.1%)	452 (9.4%)	452 (9.5%)	396 (10.5%)	326 (11.9%)
Missing	1076 (6.7%)	310 (6.5%)	316 (6.7%)	255 (6.8%)	195 (7.1%)
Father's birth country
Sweden	13219 (82.5%)	3996 (83.4%)	3929 (83.0%)	3072 (81.5%)	2222 (81.3%)
Abroad	1688 (10.5%)	469 (9.8%)	476 (10.1%)	432 (11.5%)	311 (11.4%)
Missing	1120 (7.0%)	324 (6.8%)	329 (6.9%)	267 (7.1%)	200 (7.3%)
Mother's education level
Compulsory school	1003 (6.3%)	292 (6.1%)	270 (5.7%)	236 (6.3%)	205 (7.5%)
High school	4665 (29.1%)	1356 (28.3%)	1362 (28.8%)	1084 (28.7%)	863 (31.6%)
University or higher	9047 (56.4%)	2761 (57.7%)	2721 (57.5%)	2139 (56.7%)	1426 (52.2%)
Missing	1312 (8.2%)	380 (7.9%)	381 (8.0%)	312 (8.3%)	239 (8.7%)
Father's education level
Compulsory school	2161 (13.5%)	617 (12.9%)	591 (12.5%)	530 (14.1%)	423 (15.5%)
High school	5935 (37.0%)	1766 (36.9%)	1701 (35.9%)	1409 (37.4%)	1059 (38.7%)
University or higher	6802 (42.4%)	2079 (43.4%)	2108 (44.5%)	1563 (41.4%)	1052 (38.5%)
Missing	1129 (7.0%)	327 (6.8%)	334 (7.1%)	269 (7.1%)	199 (7.3%)
Parents' highest education level
Compulsory school	693 (4.3%)	195 (4.1%)	199 (4.2%)	172 (4.6%)	127 (4.6%)
High school	3953 (24.7%)	1166 (24.3%)	1111 (23.5%)	928 (24.6%)	748 (27.4%)
University or higher	10295 (64.2%)	3111 (65.0%)	3109 (65.7%)	2415 (64.0%)	1660 (60.7%)
Missing	1086 (6.8%)	317 (6.6%)	315 (6.7%)	256 (6.8%)	198 (7.2%)
Parents' civil status
Married/cohabiting	10617 (66.2%)	3250 (67.9%)	3253 (68.7%)	2432 (64.5%)	1682 (61.5%)
Single/divorced/separted/widowed	2183 (13.6%)	611 (12.8%)	580 (12.3%)	534 (14.2%)	458 (16.8%)
Other	73 (0.5%)	14 (0.3%)	18 (0.4%)	21 (0.6%)	20 (0.7%)
Missing	3154 (19.7%)	914 (19.1%)	883 (18.7%)	784 (20.8%)	573 (21.0%)
Depressive disorders (Diagnosis)
No	15656 (97.7%)	4681 (97.7%)	4635 (97.9%)	3681 (97.6%)	2659 (97.3%)
Yes	371 (2.3%)	108 (2.3%)	99 (2.1%)	90 (2.4%)	74 (2.7%)
Self-harm (Diagnosis)
No	15955 (99.6%)	4766 (99.5%)	4714 (99.6%)	3750 (99.4%)	2725 (99.7%)
Yes	72 (0.4%)	23 (0.5%)	20 (0.4%)	21 (0.6%)	8 (0.3%)
Anxiety disorders (Diagnosis)
No	15562 (97.1%)	4652 (97.1%)	4610 (97.4%)	3655 (96.9%)	2645 (96.8%)
Yes	465 (2.9%)	137 (2.9%)	124 (2.6%)	116 (3.1%)	88 (3.2%)
SDQ (self-reported) total score
Mean (SD)	22.7 (4.68)	22.6 (4.58)	22.7 (4.54)	22.6 (4.65)	22.8 (5.10)
Median [Min	22.0 [0, 50.0]	22.0 [0, 50.0]	22.0 [1.00, 50.0]	22.0 [0, 40.0]	23.0 [4.00, 50.0]
Missing	194 (1.2%)	62 (1.3%)	57 (1.2%)	39 (1.0%)	36 (1.3%)
SDQ (self-reported) subscale score on emotional symptoms
Mean (SD)	3.09 (2.35)	2.96 (2.28)	3.04 (2.31)	3.13 (2.33)	3.38 (2.53)
Median [Min, Max]	3.00 [0, 10.0]	3.00 [0, 10.0]	3.00 [0, 10.0]	3.00 [0, 10.0]	3.00 [0, 10.0]
Missing	198 (1.2%)	63 (1.3%)	60 (1.3%)	39 (1.0%)	36 (1.3%)
At age 9: Standardized score on anxiety symptoms (based on SCARED or A-TAC anxiety subscale)
Mean (SD)	0.000000000260 (1.00)	-0.00568 (1.03)	0.00335 (1.01)	-0.0134 (0.922)	0.0230 (1.03)
Median [Min, Max]	-0.182 [-0.811, 15.2]	-0.182 [-0.811, 15.2]	-0.182 [-0.811, 11.7]	-0.182 [-0.811, 9.51]	-0.182 [-0.811, 9.30]
Missing	2882 (18.0%)	833 (17.4%)	890 (18.8%)	655 (17.4%)	504 (18.4%)
Abbreviations. MZ: Monozygotic, DZ: Dizygotic. SDQ: Strengths and Difficulties Questionnaire. SCARED: Screen for Child Anxiety Related Disorders. A-TAC: Autism-Tics, ADHD and other Comorbidities inventory.

## Sheet: eTable9
eTable 9. CATSS-15 participants' characteristics by screen use frequencies on watching TV, video, DVD during weekdays
	Total	Mon-Fri: screen time use frequencies on watching TV, video, DVD at age 15
		<2 hours/day	2-4 hours/day	4-6 hours/day	>6 hours/day
	(N=16027)	(N=8765)	(N=5007)	(N=1804)	(N=451)
Sex
Male	7228 (45.1%)	4075 (46.5%)	2147 (42.9%)	812 (45.0%)	194 (43.0%)
Female	8799 (54.9%)	4690 (53.5%)	2860 (57.1%)	992 (55.0%)	257 (57.0%)
Birth year
1994-1996	4086 (25.5%)	2341 (26.7%)	1287 (25.7%)	391 (21.7%)	67 (14.9%)
1997-1999	4135 (25.8%)	2479 (28.3%)	1183 (23.6%)	392 (21.7%)	81 (18.0%)
2000-2002	3934 (24.5%)	2078 (23.7%)	1265 (25.3%)	460 (25.5%)	131 (29.0%)
2003-2005	3872 (24.2%)	1867 (21.3%)	1272 (25.4%)	561 (31.1%)	172 (38.1%)
Zygosity
MZ twins	4751 (29.6%)	2565 (29.3%)	1505 (30.1%)	546 (30.3%)	135 (29.9%)
DZ twins same sex	5343 (33.3%)	2973 (33.9%)	1658 (33.1%)	570 (31.6%)	142 (31.5%)
DZ twins opposite sex	5569 (34.7%)	3048 (34.8%)	1735 (34.7%)	627 (34.8%)	159 (35.3%)
Unknown	364 (2.3%)	179 (2.0%)	109 (2.2%)	61 (3.4%)	15 (3.3%)
Mother's birth country
Sweden	13325 (83.1%)	7381 (84.2%)	4184 (83.6%)	1409 (78.1%)	351 (77.8%)
Abroad	1626 (10.1%)	861 (9.8%)	478 (9.5%)	232 (12.9%)	55 (12.2%)
Missing	1076 (6.7%)	523 (6.0%)	345 (6.9%)	163 (9.0%)	45 (10.0%)
Father's birth country
Sweden	13219 (82.5%)	7341 (83.8%)	4143 (82.7%)	1392 (77.2%)	343 (76.1%)
Abroad	1688 (10.5%)	881 (10.1%)	503 (10.0%)	243 (13.5%)	61 (13.5%)
Missing	1120 (7.0%)	543 (6.2%)	361 (7.2%)	169 (9.4%)	47 (10.4%)
Mother's education level
Compulsory school	1003 (6.3%)	476 (5.4%)	318 (6.4%)	155 (8.6%)	54 (12.0%)
High school	4665 (29.1%)	2379 (27.1%)	1572 (31.4%)	571 (31.7%)	143 (31.7%)
University or higher	9047 (56.4%)	5276 (60.2%)	2696 (53.8%)	878 (48.7%)	197 (43.7%)
Missing	1312 (8.2%)	634 (7.2%)	421 (8.4%)	200 (11.1%)	57 (12.6%)
Father's education level
Compulsory school	2161 (13.5%)	1034 (11.8%)	714 (14.3%)	322 (17.8%)	91 (20.2%)
High school	5935 (37.0%)	3107 (35.4%)	1959 (39.1%)	692 (38.4%)	177 (39.2%)
University or higher	6802 (42.4%)	4078 (46.5%)	1972 (39.4%)	617 (34.2%)	135 (29.9%)
Missing	1129 (7.0%)	546 (6.2%)	362 (7.2%)	173 (9.6%)	48 (10.6%)
Parents' highest education level
Compulsory school	693 (4.3%)	321 (3.7%)	224 (4.5%)	110 (6.1%)	38 (8.4%)
High school	3953 (24.7%)	1974 (22.5%)	1349 (26.9%)	498 (27.6%)	132 (29.3%)
University or higher	10295 (64.2%)	5944 (67.8%)	3085 (61.6%)	1031 (57.2%)	235 (52.1%)
Missing	1086 (6.8%)	526 (6.0%)	349 (7.0%)	165 (9.1%)	46 (10.2%)
Parents' civil status
Married/cohabiting	10617 (66.2%)	5995 (68.4%)	3283 (65.6%)	1087 (60.3%)	252 (55.9%)
Single/divorced/separted/widowed	2183 (13.6%)	1111 (12.7%)	707 (14.1%)	288 (16.0%)	77 (17.1%)
Other	73 (0.5%)	32 (0.4%)	26 (0.5%)	12 (0.7%)	3 (0.7%)
Missing	3154 (19.7%)	1627 (18.6%)	991 (19.8%)	417 (23.1%)	119 (26.4%)
Depressive disorders (Diagnosis)
No	15656 (97.7%)	8556 (97.6%)	4898 (97.8%)	1760 (97.6%)	442 (98.0%)
Yes	371 (2.3%)	209 (2.4%)	109 (2.2%)	44 (2.4%)	9 (2.0%)
Self-harm (Diagnosis)
No	15955 (99.6%)	8718 (99.5%)	4987 (99.6%)	1799 (99.7%)	451 (100%)
Yes	72 (0.4%)	47 (0.5%)	20 (0.4%)	5 (0.3%)	0 (0%)
Anxiety disorders (Diagnosis)
No	15562 (97.1%)	8503 (97.0%)	4877 (97.4%)	1747 (96.8%)	435 (96.5%)
Yes	465 (2.9%)	262 (3.0%)	130 (2.6%)	57 (3.2%)	16 (3.5%)
SDQ (self-reported) total score
Mean (SD)	22.7 (4.68)	22.5 (4.55)	22.7 (4.65)	23.1 (5.03)	23.6 (5.60)
Median [Min	22.0 [0, 50.0]	22.0 [0, 50.0]	22.0 [0, 50.0]	23.0 [0, 40.0]	23.0 [4.00, 50.0]
Missing	194 (1.2%)	93 (1.1%)	59 (1.2%)	29 (1.6%)	13 (2.9%)
SDQ (self-reported) subscale score on emotional symptoms
Mean (SD)	3.09 (2.35)	2.96 (2.30)	3.13 (2.33)	3.52 (2.49)	3.76 (2.62)
Median [Min, Max]	3.00 [0, 10.0]	3.00 [0, 10.0]	3.00 [0, 10.0]	3.00 [0, 10.0]	3.00 [0, 10.0]
Missing	198 (1.2%)	94 (1.1%)	61 (1.2%)	30 (1.7%)	13 (2.9%)
At age 9: Standardized score on anxiety symptoms (based on SCARED or A-TAC anxiety subscale)
Mean (SD)	0.000000000260 (1.00)	-0.0276 (0.946)	0.00633 (1.02)	0.0999 (1.19)	0.101 (1.04)
Median [Min, Max]	-0.182 [-0.811, 15.2]	-0.182 [-0.811, 15.2]	-0.182 [-0.811, 12.9]	-0.182 [-0.811, 11.7]	-0.182 [-0.811, 6.40]
Missing	2882 (18.0%)	1496 (17.1%)	873 (17.4%)	408 (22.6%)	105 (23.3%)
Abbreviations. MZ: Monozygotic, DZ: Dizygotic. SDQ: Strengths and Difficulties Questionnaire. SCARED: Screen for Child Anxiety Related Disorders. A-TAC: Autism-Tics, ADHD and other Comorbidities inventory.

## Sheet: eTable10
eTable 10. CATSS-15 participants' characteristics by screen use frequencies on watching TV, video, DVD during weekend
	Total	Sat-Sun: screen time use frequencies on watching TV, video, DVD at age 15
		<2 hours/day	2-4 hours/day	4-6 hours/day	>6 hours/day
	(N=16027)	(N=5667)	(N=6016)	(N=3091)	(N=1253)
Sex
Male	7228 (45.1%)	2832 (50.0%)	2486 (41.3%)	1329 (43.0%)	581 (46.4%)
Female	8799 (54.9%)	2835 (50.0%)	3530 (58.7%)	1762 (57.0%)	672 (53.6%)
Birth year
1994-1996	4086 (25.5%)	1454 (25.7%)	1678 (27.9%)	732 (23.7%)	222 (17.7%)
1997-1999	4135 (25.8%)	1578 (27.8%)	1580 (26.3%)	715 (23.1%)	262 (20.9%)
2000-2002	3934 (24.5%)	1375 (24.3%)	1445 (24.0%)	760 (24.6%)	354 (28.3%)
2003-2005	3872 (24.2%)	1260 (22.2%)	1313 (21.8%)	884 (28.6%)	415 (33.1%)
Zygosity
MZ twins	4751 (29.6%)	1633 (28.8%)	1841 (30.6%)	921 (29.8%)	356 (28.4%)
DZ twins same sex	5343 (33.3%)	1884 (33.2%)	2058 (34.2%)	990 (32.0%)	411 (32.8%)
DZ twins opposite sex	5569 (34.7%)	2024 (35.7%)	1999 (33.2%)	1096 (35.5%)	450 (35.9%)
Unknown	364 (2.3%)	126 (2.2%)	118 (2.0%)	84 (2.7%)	36 (2.9%)
Mother's birth country
Sweden	13325 (83.1%)	4729 (83.4%)	5123 (85.2%)	2517 (81.4%)	956 (76.3%)
Abroad	1626 (10.1%)	573 (10.1%)	535 (8.9%)	329 (10.6%)	189 (15.1%)
Missing	1076 (6.7%)	365 (6.4%)	358 (6.0%)	245 (7.9%)	108 (8.6%)
Father's birth country
Sweden	13219 (82.5%)	4713 (83.2%)	5057 (84.1%)	2500 (80.9%)	949 (75.7%)
Abroad	1688 (10.5%)	574 (10.1%)	587 (9.8%)	339 (11.0%)	188 (15.0%)
Missing	1120 (7.0%)	380 (6.7%)	372 (6.2%)	252 (8.2%)	116 (9.3%)
Mother's education level
Compulsory school	1003 (6.3%)	324 (5.7%)	350 (5.8%)	224 (7.2%)	105 (8.4%)
High school	4665 (29.1%)	1536 (27.1%)	1815 (30.2%)	921 (29.8%)	393 (31.4%)
University or higher	9047 (56.4%)	3382 (59.7%)	3396 (56.4%)	1653 (53.5%)	616 (49.2%)
Missing	1312 (8.2%)	425 (7.5%)	455 (7.6%)	293 (9.5%)	139 (11.1%)
Father's education level
Compulsory school	2161 (13.5%)	727 (12.8%)	760 (12.6%)	449 (14.5%)	225 (18.0%)
High school	5935 (37.0%)	1976 (34.9%)	2284 (38.0%)	1208 (39.1%)	467 (37.3%)
University or higher	6802 (42.4%)	2590 (45.7%)	2592 (43.1%)	1173 (37.9%)	447 (35.7%)
Missing	1129 (7.0%)	374 (6.6%)	380 (6.3%)	261 (8.4%)	114 (9.1%)
Parents' highest education level
Compulsory school	693 (4.3%)	224 (4.0%)	237 (3.9%)	158 (5.1%)	74 (5.9%)
High school	3953 (24.7%)	1257 (22.2%)	1543 (25.6%)	803 (26.0%)	350 (27.9%)
University or higher	10295 (64.2%)	3824 (67.5%)	3871 (64.3%)	1881 (60.9%)	719 (57.4%)
Missing	1086 (6.8%)	362 (6.4%)	365 (6.1%)	249 (8.1%)	110 (8.8%)
Parents' civil status
Married/cohabiting	10617 (66.2%)	3780 (66.7%)	4128 (68.6%)	1980 (64.1%)	729 (58.2%)
Single/divorced/separted/widowed	2183 (13.6%)	766 (13.5%)	761 (12.6%)	440 (14.2%)	216 (17.2%)
Other	73 (0.5%)	20 (0.4%)	25 (0.4%)	18 (0.6%)	10 (0.8%)
Missing	3154 (19.7%)	1101 (19.4%)	1102 (18.3%)	653 (21.1%)	298 (23.8%)
Depressive disorders (Diagnosis)
No	15656 (97.7%)	5530 (97.6%)	5877 (97.7%)	3026 (97.9%)	1223 (97.6%)
Yes	371 (2.3%)	137 (2.4%)	139 (2.3%)	65 (2.1%)	30 (2.4%)
Self-harm (Diagnosis)
No	15955 (99.6%)	5638 (99.5%)	5985 (99.5%)	3081 (99.7%)	1251 (99.8%)
Yes	72 (0.4%)	29 (0.5%)	31 (0.5%)	10 (0.3%)	2 (0.2%)
Anxiety disorders (Diagnosis)
No	15562 (97.1%)	5494 (96.9%)	5846 (97.2%)	3014 (97.5%)	1208 (96.4%)
Yes	465 (2.9%)	173 (3.1%)	170 (2.8%)	77 (2.5%)	45 (3.6%)
SDQ (self-reported) total score
Mean (SD)	22.7 (4.68)	22.4 (4.64)	22.6 (4.48)	23.0 (4.80)	23.4 (5.32)
Median [Min	22.0 [0, 50.0]	22.0 [0, 50.0]	22.0 [0, 50.0]	23.0 [3.00, 50.0]	23.0 [1.00, 40.0]
Missing	194 (1.2%)	70 (1.2%)	60 (1.0%)	41 (1.3%)	23 (1.8%)
SDQ (self-reported) subscale score on emotional symptoms
Mean (SD)	3.09 (2.35)	2.82 (2.26)	3.08 (2.29)	3.38 (2.43)	3.71 (2.59)
Median [Min, Max]	3.00 [0, 10.0]	2.00 [0, 10.0]	3.00 [0, 10.0]	3.00 [0, 10.0]	3.00 [0, 10.0]
Missing	198 (1.2%)	72 (1.3%)	60 (1.0%)	42 (1.4%)	24 (1.9%)
At age 9: Standardized score on anxiety symptoms (based on SCARED or A-TAC anxiety subscale)
Mean (SD)	0.000000000260 (1.00)	-0.0419 (0.928)	0.00805 (1.04)	0.00982 (0.973)	0.135 (1.16)
Median [Min, Max]	-0.182 [-0.811, 15.2]	-0.182 [-0.811, 15.2]	-0.182 [-0.811, 12.9]	-0.182 [-0.811, 11.7]	-0.182 [-0.811, 8.20]
Missing	2882 (18.0%)	1006 (17.8%)	988 (16.4%)	599 (19.4%)	289 (23.1%)
Abbreviations. MZ: Monozygotic, DZ: Dizygotic. SDQ: Strengths and Difficulties Questionnaire. SCARED: Screen for Child Anxiety Related Disorders. A-TAC: Autism-Tics, ADHD and other Comorbidities inventory.

## Sheet: eTable11
eTable 11. CATSS-18 participants' characteristics by screen use frequencies on playing games, chat, browsing internet during weekdays
	Total	Mon-Fri: playing games, chat, browsing internet at age 18
		<2 hours/day	2-4 hours/day	4-6 hours/day	>6 hours/day
	(N=13050)	(N=5111)	(N=4397)	(N=2472)	(N=1070)
Sex
Male	5423 (41.6%)	1846 (36.1%)	1904 (43.3%)	1128 (45.6%)	545 (50.9%)
Female	7627 (58.4%)	3265 (63.9%)	2493 (56.7%)	1344 (54.4%)	525 (49.1%)
Birth year
1993-1996	5415 (41.5%)	2382 (46.6%)	1759 (40.0%)	868 (35.1%)	406 (37.9%)
1997-1999	3922 (30.1%)	1468 (28.7%)	1317 (30.0%)	780 (31.6%)	357 (33.4%)
2000-2002	3713 (28.5%)	1261 (24.7%)	1321 (30.0%)	824 (33.3%)	307 (28.7%)
Zygosity
MZ twins	3800 (29.1%)	1553 (30.4%)	1293 (29.4%)	655 (26.5%)	299 (27.9%)
DZ twins same sex	4437 (34.0%)	1761 (34.5%)	1464 (33.3%)	857 (34.7%)	355 (33.2%)
DZ twins opposite sex	4584 (35.1%)	1697 (33.2%)	1571 (35.7%)	922 (37.3%)	394 (36.8%)
Unknown	229 (1.8%)	100 (2.0%)	69 (1.6%)	38 (1.5%)	22 (2.1%)
Mother's birth country
Sweden	7404 (56.7%)	2947 (57.7%)	2523 (57.4%)	1381 (55.9%)	553 (51.7%)
Abroad	850 (6.5%)	324 (6.3%)	286 (6.5%)	159 (6.4%)	81 (7.6%)
Missing	4796 (36.8%)	1840 (36.0%)	1588 (36.1%)	932 (37.7%)	436 (40.7%)
Father's birth country
Sweden	7352 (56.3%)	2953 (57.8%)	2488 (56.6%)	1366 (55.3%)	545 (50.9%)
Abroad	874 (6.7%)	308 (6.0%)	310 (7.1%)	169 (6.8%)	87 (8.1%)
Missing	4824 (37.0%)	1850 (36.2%)	1599 (36.4%)	937 (37.9%)	438 (40.9%)
Mother's education level
Compulsory school	509 (3.9%)	173 (3.4%)	172 (3.9%)	111 (4.5%)	53 (5.0%)
High school	2666 (20.4%)	1003 (19.6%)	871 (19.8%)	542 (21.9%)	250 (23.4%)
University or higher	4964 (38.0%)	2056 (40.2%)	1728 (39.3%)	859 (34.7%)	321 (30.0%)
Missing	4911 (37.6%)	1879 (36.8%)	1626 (37.0%)	960 (38.8%)	446 (41.7%)
Father's education level
Compulsory school	1172 (9.0%)	409 (8.0%)	396 (9.0%)	244 (9.9%)	123 (11.5%)
High school	3260 (25.0%)	1236 (24.2%)	1132 (25.7%)	633 (25.6%)	259 (24.2%)
University or higher	3794 (29.1%)	1615 (31.6%)	1273 (29.0%)	656 (26.5%)	250 (23.4%)
Missing	4824 (37.0%)	1851 (36.2%)	1596 (36.3%)	939 (38.0%)	438 (40.9%)
Parents' highest education level
Compulsory school	347 (2.7%)	122 (2.4%)	114 (2.6%)	74 (3.0%)	37 (3.5%)
High school	2210 (16.9%)	813 (15.9%)	725 (16.5%)	464 (18.8%)	208 (19.4%)
University or higher	5688 (43.6%)	2333 (45.6%)	1966 (44.7%)	1001 (40.5%)	388 (36.3%)
Missing	4805 (36.8%)	1843 (36.1%)	1592 (36.2%)	933 (37.7%)	437 (40.8%)
Parents' civil status
Married/cohabiting	8140 (62.4%)	3347 (65.5%)	2741 (62.3%)	1484 (60.0%)	568 (53.1%)
Single/divorced/separted/widowed	1775 (13.6%)	623 (12.2%)	579 (13.2%)	374 (15.1%)	199 (18.6%)
Missing	3135 (24.0%)	1141 (22.3%)	1077 (24.5%)	614 (24.8%)	303 (28.3%)
At age 18: SCARED total score
Mean (SD)	16.6 (11.8)	15.4 (11.1)	16.4 (11.5)	18.0 (12.3)	20.5 (13.7)
Median [Min, Max]	14.0 [0, 76.0]	13.0 [0, 76.0]	14.0 [0, 71.0]	16.0 [0, 76.0]	17.0 [0, 70.0]
Missing	679 (5.2%)	237 (4.6%)	227 (5.2%)	148 (6.0%)	67 (6.3%)
At age 18: CESD total score
Mean (SD)	10.1 (4.79)	9.72 (4.53)	10.0 (4.63)	10.7 (5.01)	11.4 (5.72)
Median [Min, Max]	9.00 [0, 33.0]	9.00 [0, 29.0]	9.00 [0, 33.0]	10.0 [0, 33.0]	11.0 [0, 33.0]
Missing	380 (2.9%)	140 (2.7%)	121 (2.8%)	82 (3.3%)	37 (3.5%)
At age 15: SDQ (self-reported) total score
Mean (SD)	22.5 (4.54)	22.4 (4.38)	22.5 (4.50)	22.5 (4.77)	22.7 (4.96)
Median [Min, Max]	22.0 [0, 50.0]	22.0 [2.00, 50.0]	22.0 [0, 39.0]	22.0 [6.00, 40.0]	22.0 [0, 40.0]
Missing	4456 (34.1%)	1698 (33.2%)	1491 (33.9%)	860 (34.8%)	407 (38.0%)
At age 15: SDQ (self-reported) subscale score on emotional symptoms
Mean (SD)	3.05 (2.30)	2.92 (2.25)	3.05 (2.27)	3.23 (2.35)	3.34 (2.46)
Median [Min, Max]	3.00 [0, 10.0]	3.00 [0, 10.0]	3.00 [0, 10.0]	3.00 [0, 10.0]	3.00 [0, 10.0]
Missing	4456 (34.1%)	1698 (33.2%)	1491 (33.9%)	860 (34.8%)	407 (38.0%)
At age 9: Standardized score on anxiety symptoms (based on SCARED or A-TAC anxiety subscale)
Mean (SD)	-0.0280 (0.940)	-0.0344 (0.951)	-0.0540 (0.888)	0.0345 (1.02)	-0.0312 (0.904)
Median [Min, Max]	-0.182 [-0.811, 15.2]	-0.182 [-0.811, 12.9]	-0.182 [-0.811, 15.2]	-0.182 [-0.811, 9.30]	-0.182 [-0.811, 8.11]
Missing	5629 (43.1%)	2169 (42.4%)	1865 (42.4%)	1090 (44.1%)	505 (47.2%)
Abbreviations. MZ: Monozygotic, DZ: Dizygotic. SDQ: Strengths and Difficulties Questionnaire. CESD: Center for Epidemiologic Studies Depression Scale. SCARED: Screen for Child Anxiety Related Disorders. A-TAC: Autism-Tics, ADHD and other Comorbidities inventory.

## Sheet: eTable12
eTable 12. CATSS-18 participants' characteristics by screen use frequencies on playing games, chat, browsing internet during weekend
	Total	Sat-Sun: playing games, chat, browsing internet at age 18
		<2 hours/day	2-4 hours/day	4-6 hours/day	>6 hours/day
	(N=13050)	(N=3881)	(N=4002)	(N=3086)	(N=2081)
Sex
Male	5423 (41.6%)	1177 (30.3%)	1532 (38.3%)	1481 (48.0%)	1233 (59.3%)
Female	7627 (58.4%)	2704 (69.7%)	2470 (61.7%)	1605 (52.0%)	848 (40.7%)
Birth year
1993-1996	5415 (41.5%)	1885 (48.6%)	1677 (41.9%)	1105 (35.8%)	748 (35.9%)
1997-1999	3922 (30.1%)	1081 (27.9%)	1182 (29.5%)	968 (31.4%)	691 (33.2%)
2000-2002	3713 (28.5%)	915 (23.6%)	1143 (28.6%)	1013 (32.8%)	642 (30.9%)
Zygosity
MZ twins	3800 (29.1%)	1198 (30.9%)	1205 (30.1%)	829 (26.9%)	568 (27.3%)
DZ twins same sex	4437 (34.0%)	1308 (33.7%)	1359 (34.0%)	1054 (34.2%)	716 (34.4%)
DZ twins opposite sex	4584 (35.1%)	1299 (33.5%)	1382 (34.5%)	1143 (37.0%)	760 (36.5%)
Unknown	229 (1.8%)	76 (2.0%)	56 (1.4%)	60 (1.9%)	37 (1.8%)
Mother's birth country
Sweden	7404 (56.7%)	2190 (56.4%)	2351 (58.7%)	1739 (56.4%)	1124 (54.0%)
Abroad	850 (6.5%)	233 (6.0%)	240 (6.0%)	213 (6.9%)	164 (7.9%)
Missing	4796 (36.8%)	1458 (37.6%)	1411 (35.3%)	1134 (36.7%)	793 (38.1%)
Father's birth country
Sweden	7352 (56.3%)	2194 (56.5%)	2330 (58.2%)	1705 (55.2%)	1123 (54.0%)
Abroad	874 (6.7%)	223 (5.7%)	254 (6.3%)	238 (7.7%)	159 (7.6%)
Missing	4824 (37.0%)	1464 (37.7%)	1418 (35.4%)	1143 (37.0%)	799 (38.4%)
Mother's education level
Compulsory school	509 (3.9%)	127 (3.3%)	142 (3.5%)	141 (4.6%)	99 (4.8%)
High school	2666 (20.4%)	776 (20.0%)	801 (20.0%)	621 (20.1%)	468 (22.5%)
University or higher	4964 (38.0%)	1489 (38.4%)	1608 (40.2%)	1163 (37.7%)	704 (33.8%)
Missing	4911 (37.6%)	1489 (38.4%)	1451 (36.3%)	1161 (37.6%)	810 (38.9%)
Father's education level
Compulsory school	1172 (9.0%)	315 (8.1%)	348 (8.7%)	293 (9.5%)	216 (10.4%)
High school	3260 (25.0%)	927 (23.9%)	1021 (25.5%)	770 (25.0%)	542 (26.0%)
University or higher	3794 (29.1%)	1175 (30.3%)	1211 (30.3%)	883 (28.6%)	525 (25.2%)
Missing	4824 (37.0%)	1464 (37.7%)	1422 (35.5%)	1140 (36.9%)	798 (38.3%)
Parents' highest education level
Compulsory school	347 (2.7%)	88 (2.3%)	102 (2.5%)	91 (2.9%)	66 (3.2%)
High school	2210 (16.9%)	627 (16.2%)	663 (16.6%)	521 (16.9%)	399 (19.2%)
University or higher	5688 (43.6%)	1706 (44.0%)	1820 (45.5%)	1340 (43.4%)	822 (39.5%)
Missing	4805 (36.8%)	1460 (37.6%)	1417 (35.4%)	1134 (36.7%)	794 (38.2%)
Parents' civil status
Married/cohabiting	8140 (62.4%)	2478 (63.8%)	2562 (64.0%)	1900 (61.6%)	1200 (57.7%)
Single/divorced/separted/widowed	1775 (13.6%)	471 (12.1%)	534 (13.3%)	429 (13.9%)	341 (16.4%)
Missing	3135 (24.0%)	932 (24.0%)	906 (22.6%)	757 (24.5%)	540 (25.9%)
At age 18: SCARED total score
Mean (SD)	16.6 (11.8)	15.4 (11.1)	16.2 (11.3)	17.3 (12.1)	18.9 (13.1)
Median [Min, Max]	14.0 [0, 76.0]	13.0 [0, 76.0]	14.0 [0, 70.0]	15.0 [0, 76.0]	16.0 [0, 76.0]
Missing	679 (5.2%)	180 (4.6%)	206 (5.1%)	164 (5.3%)	129 (6.2%)
At age 18: CESD total score
Mean (SD)	10.1 (4.79)	9.74 (4.55)	10.1 (4.59)	10.3 (4.80)	10.9 (5.45)
Median [Min, Max]	9.00 [0, 33.0]	9.00 [0, 29.0]	9.00 [0, 29.0]	10.0 [0, 32.0]	10.0 [0, 33.0]
Missing	380 (2.9%)	106 (2.7%)	104 (2.6%)	98 (3.2%)	72 (3.5%)
At age 15: SDQ (self-reported) total score
Mean (SD)	22.5 (4.54)	22.5 (4.34)	22.5 (4.51)	22.6 (4.57)	22.3 (4.93)
Median [Min, Max]	22.0 [0, 50.0]	22.0 [0, 50.0]	22.0 [5.00, 39.0]	22.0 [6.00, 42.0]	22.0 [0, 40.0]
Missing	4456 (34.1%)	1337 (34.4%)	1316 (32.9%)	1063 (34.4%)	740 (35.6%)
At age 15: SDQ (self-reported) subscale score on emotional symptoms
Mean (SD)	3.05 (2.30)	2.93 (2.23)	3.02 (2.28)	3.16 (2.33)	3.18 (2.39)
Median [Min, Max]	3.00 [0, 10.0]	3.00 [0, 10.0]	3.00 [0, 10.0]	3.00 [0, 10.0]	3.00 [0, 10.0]
Missing	4456 (34.1%)	1337 (34.4%)	1316 (32.9%)	1063 (34.4%)	740 (35.6%)
At age 9: Standardized score on anxiety symptoms (based on SCARED or A-TAC anxiety subscale)
Mean (SD)	-0.0280 (0.940)	-0.0383 (0.967)	-0.0568 (0.893)	-0.000605 (0.955)	0.00862 (0.959)
Median [Min, Max]	-0.182 [-0.811, 15.2]	-0.182 [-0.811, 12.9]	-0.182 [-0.811, 15.2]	-0.182 [-0.811, 9.30]	-0.182 [-0.811, 9.30]
Missing	5629 (43.1%)	1700 (43.8%)	1654 (41.3%)	1344 (43.6%)	931 (44.7%)
Abbreviations. MZ: Monozygotic, DZ: Dizygotic. SDQ: Strengths and Difficulties Questionnaire. CESD: Center for Epidemiologic Studies Depression Scale. SCARED: Screen for Child Anxiety Related Disorders. A-TAC: Autism-Tics, ADHD and other Comorbidities inventory.

[truncated: 16 more sheets: eTable13, eTable14, eTable15, eTable16, eTable17, eTable18, eTable19, eTable20, eTable21, eTable22, eTable23, eTable24, eTable25, eTable26, eTable27, eTable28]
